# Supplementary material for: Simple models for the simulation of submarine melt for a Greenland glacial system model
Source: Copernicus journal article supplement (doi:10.5194/tc-12-301-2018), 2018-01-26
Supplement: Supplementary file 1 [file tc-12-301-2018-supplement.zip]

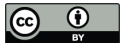

## *Supplement of*

# **Simple models for the simulation of submarine melt for a Greenland glacial system model**

**Johanna Beckmann et al.**

*Correspondence to:* Johanna Beckmannn (beckmann@pik-potsdam.de)

- tc-12-301-2018-supplement-title-page.pdf
- plume\_models\_python
  - .git
    - \* COMMIT\_EDITMSG
    - \* HEAD
    - \* branches
    - \* config
    - \* description
    - \* hooks
    - \* index
    - \* info
    - \* logs
    - \* objects
    - \* refs
  - README
  - ice\_ocean\_public.py
  - ice\_ocean\_public.pyc
  - rk\_public.py
  - rk\_public.pyc
  - test.py

The copyright of individual parts of the supplement might differ from the CC BY 3.0 License.
